# Supplementary material for: Korean Red Ginseng Extract Attenuates 3-Nitropropionic Acid-Induced Huntington’s-Like Symptoms
Source: Hindawi journal article supplement (doi:10.1155/2013/237207), 2013-01-01

# Supplementary Data 1

| Treatment                        | Group          | Neurodeficit score |   |   |   |   |   |   |   |   |   |    | Total number | Survival rate (%) | Lesioned mice; No. (%) |
|----------------------------------|----------------|--------------------|---|---|---|---|---|---|---|---|---|----|--------------|-------------------|------------------------|
|                                  |                | 0                  | 1 | 2 | 3 | 4 | 5 | 6 | 7 | 8 | 9 | 10 |              |                   |                        |
| Pre-administration (- 10 day)    | Normal         | 10                 |   |   |   |   |   |   |   |   |   |    | 10           | 10 (100.0)        | 0 (0.0)                |
|                                  | 3-NP+saline    |                    |   |   |   |   |   | 3 | 6 | 0 | 3 | 3  | 31           | 15 (48.4)         | 6 (40.0)               |
|                                  | 3-NP+KRG 50    |                    |   |   |   |   | 2 | 2 | 5 | 2 | 2 | 1  | 18           | 14 (77.8)         | 3 (21.4)               |
|                                  | 3-NP+KRG 100   |                    |   |   | 2 | 5 | 4 | 2 |   |   |   |    | 16           | 13 (81.3)         | 2 (15.3)               |
|                                  | 3-NP+KRG 250   |                    | 2 | 2 | 4 | 5 |   |   |   |   |   |    | 15           | 13 (86.7)         | 1 (7.7)                |
|                                  | Saline+KRG 250 | 3                  |   |   |   |   |   |   |   |   |   |    | 3            | 3 (100.0)         | 0 (0.0)                |
| Co-administration (0 day)        | Normal         | 10                 |   |   |   |   |   |   |   |   |   |    | 10           | 10 (100.0)        | 0 (0.0)                |
|                                  | 3-NP+saline    |                    |   |   |   |   |   | 5 | 3 | 1 | 2 | 2  | 31           | 13 (41.9)         | 8 (61.5)               |
|                                  | 3-NP+KRG 50    |                    |   |   |   |   | 2 | 4 | 3 | 1 | 0 | 2  | 18           | 12 (66.7)         | 4 (33.3)               |
|                                  | 3-NP+KRG 100   |                    |   |   |   | 1 | 1 | 6 | 2 | 1 |   |    | 16           | 11 (68.8)         | 3 (27.3)               |
|                                  | 3-NP+KRG 250   |                    |   |   | 1 | 3 | 1 | 2 | 4 |   |   |    | 15           | 11 (73.3)         | 2 (18.2)               |
|                                  | Saline+KRG 250 | 3                  |   |   |   |   |   |   |   |   |   |    | 3            | 3 (100.0)         | 0 (0.0)                |
| Peak time administration (2 day) | Normal         | 10                 |   |   |   |   |   |   |   |   |   |    | 10           | 10 (100.0)        | -                      |
|                                  | 3-NP+saline    |                    |   |   |   | 3 | 1 |   |   |   |   |    | 8            | 4 (50.0)          | -                      |
|                                  | 3-NP+KRG 50    |                    |   |   | 1 | 2 | 1 |   |   |   |   |    | 8            | 4 (50.0)          | -                      |
|                                  | 3-NP+KRG 100   |                    |   |   | 1 | 4 |   |   |   |   |   |    | 8            | 5 (62.5)          | -                      |
|                                  | 3-NP+KRG 250   |                    |   |   | 1 | 3 | 1 |   |   |   |   |    | 8            | 5 (62.5)          | -                      |
|                                  | Saline+KRG 250 | 3                  |   |   |   |   |   |   |   |   |   |    | 3            | 3/3(100)          | -                      |

# Supplementary Data 2

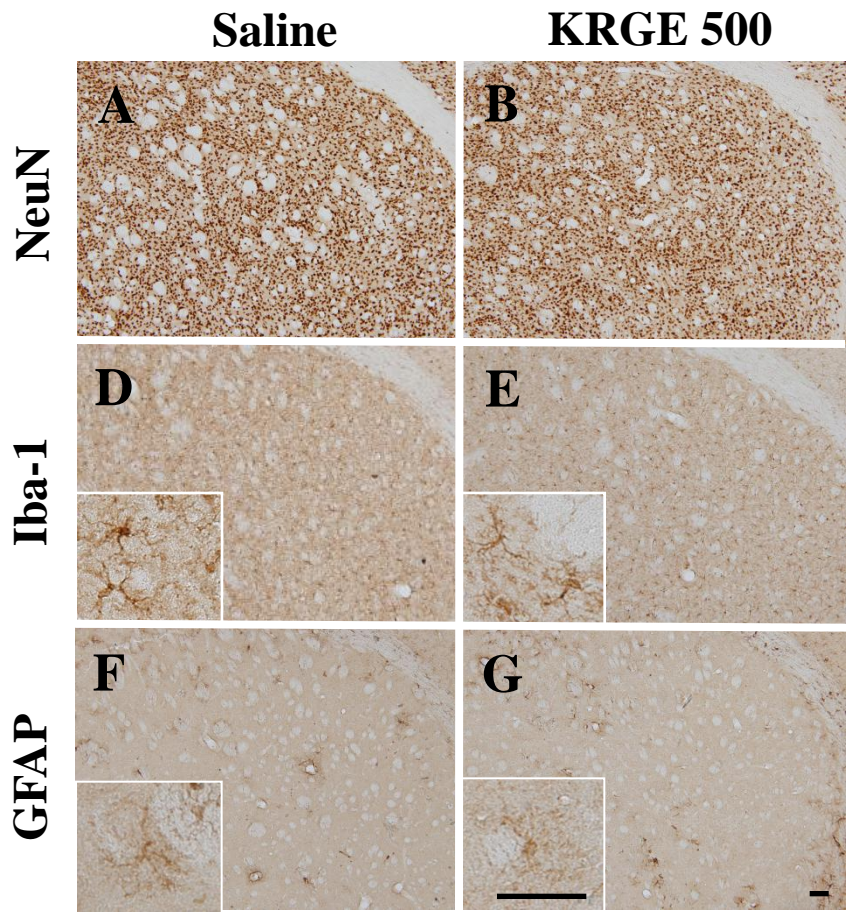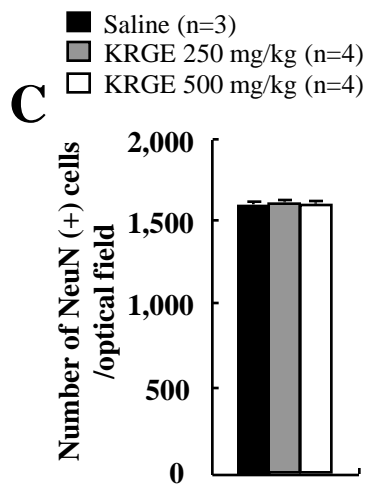

# Supplementary Data 2 – continued

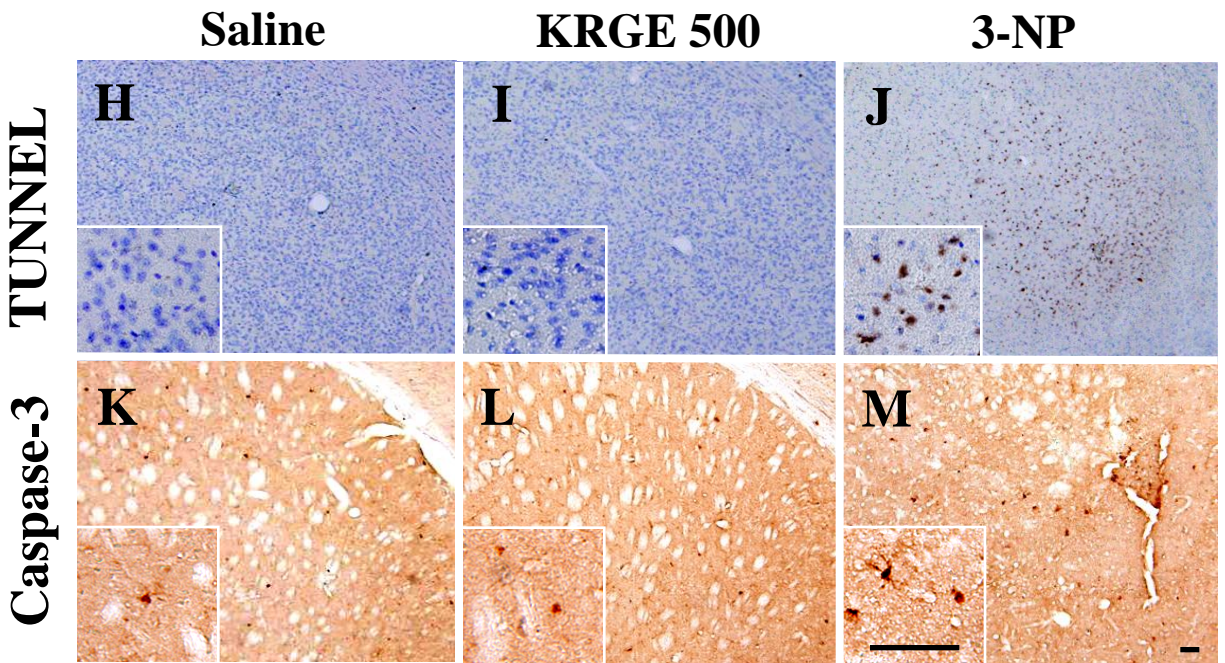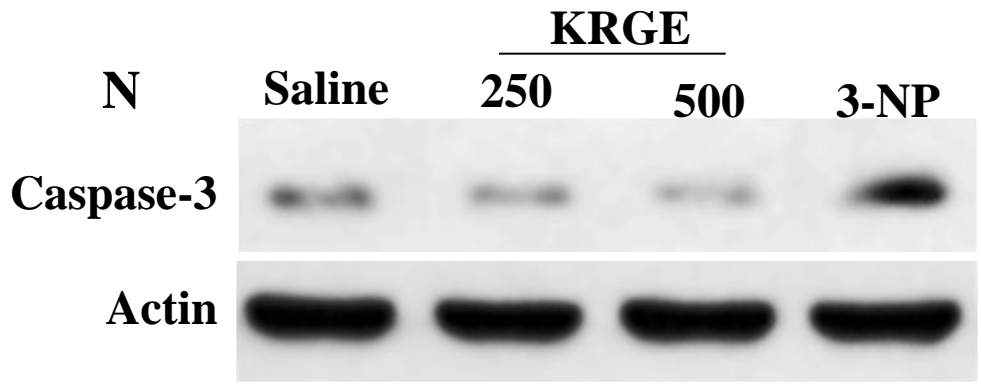

Supplement: f1 [file 237207.f1.pdf]
